# Supplementary material for: Glia instruct axon regeneration via a ternary modulation of neuronal calcium channels in Drosophila
Source: PubMed Central journal article supplement (PMC10576831; doi:10.1038/s41467-023-42306-2), 2023-10-14
Supplement: 41467_2023_42306_MOESM1_ESM.pdf [file 41467_2023_42306_MOESM1_ESM.pdf]

**Glia instruct axon regeneration via a ternary modulation of neuronal calcium channels in  
*Drosophila***

**Supplementary Information**

Supplementary Figures 1-8

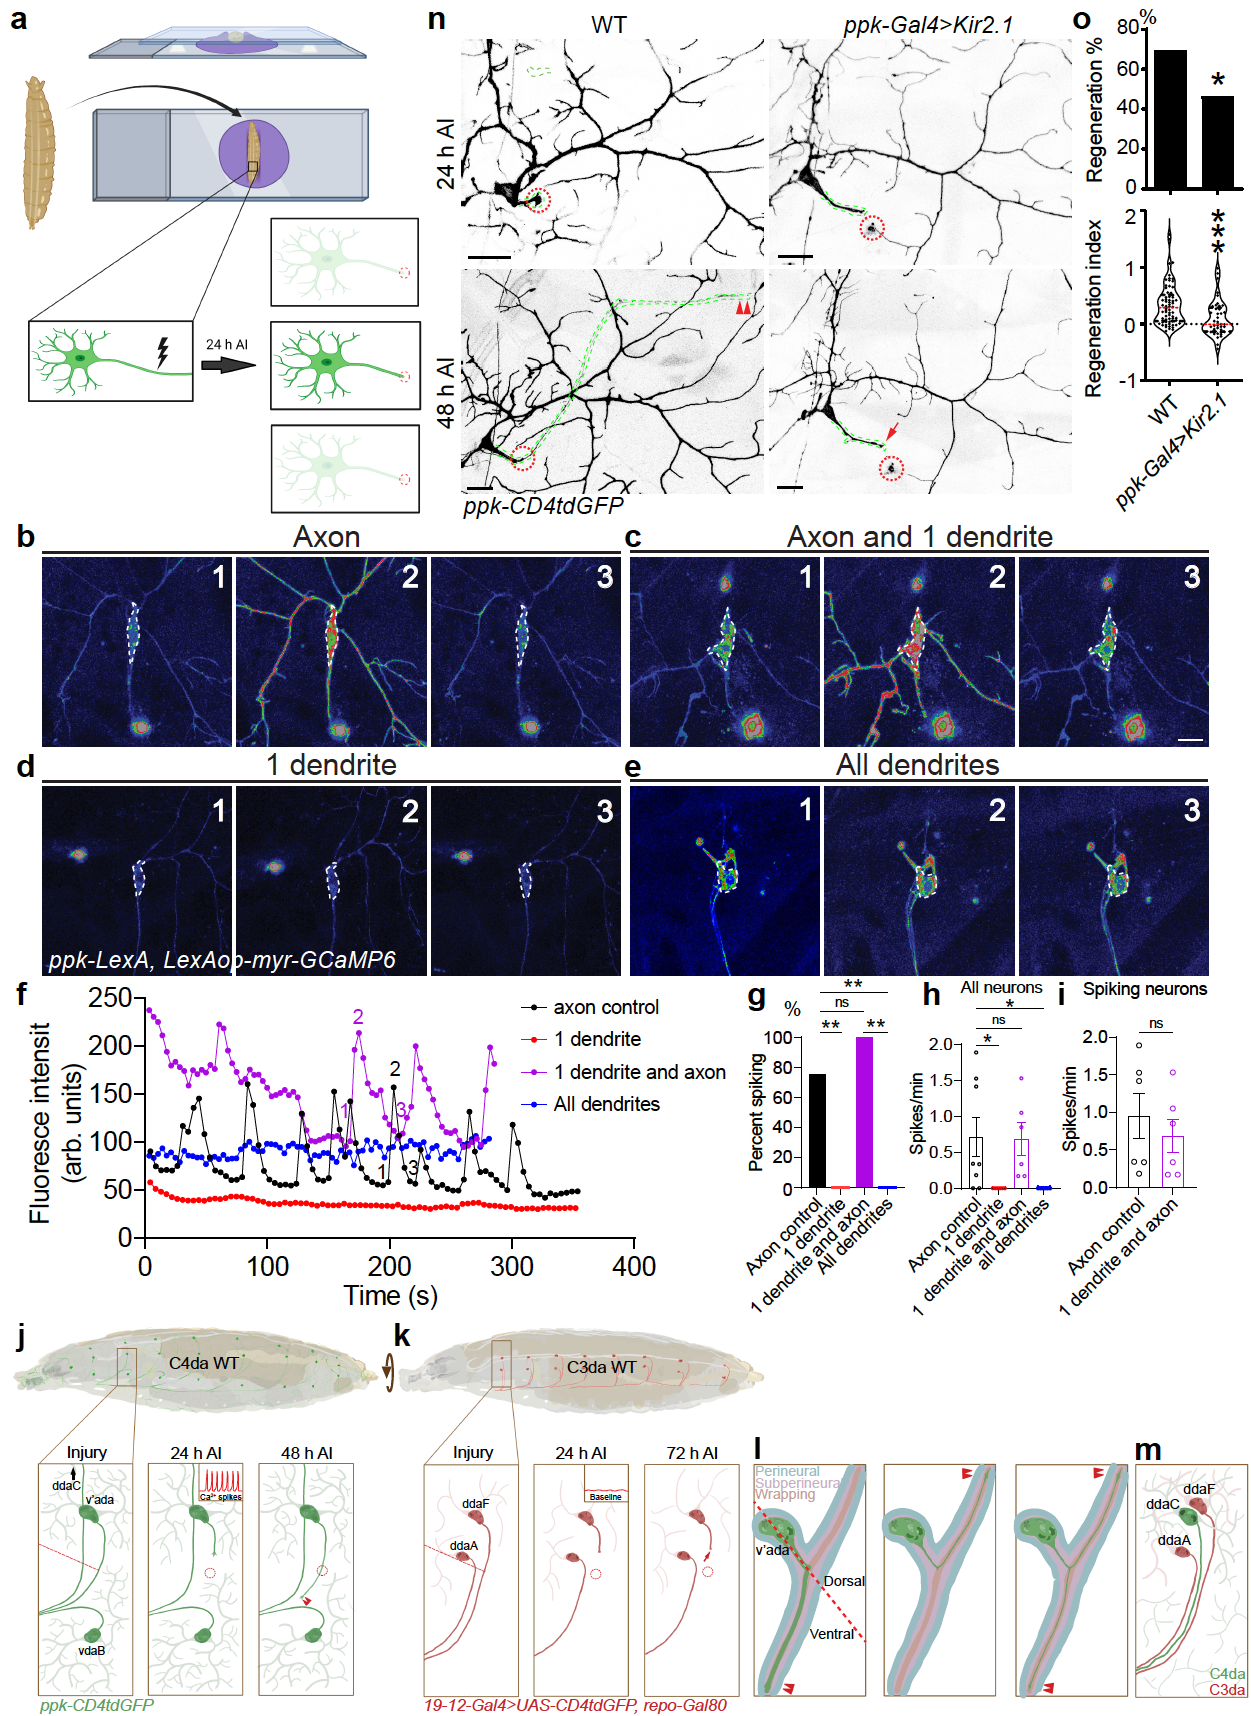

**Supplementary Fig. 1 Ca<sup>2+</sup> imaging paradigm, dendrite injury and axon regeneration quantification.** (a) Ca<sup>2+</sup> imaging set up for unanesthetized larvae. A larva is immobilized on a slide using clay. Axotomy is performed and Ca<sup>2+</sup> imaging is performed at 24 h AI. The illustration in panel a was created using Biorender.com. (b-e) Dendrite injury does not induce Ca<sup>2+</sup> transients. (f) Plots of the mean fluorescence intensity over time in the cell body. (g) Quantification of the percent of neurons showing Ca<sup>2+</sup> spikes.  $N = 8, 6, 6, 6$  neurons,  $P = 0.0097, 0.4725, 0.0097, 0.0022$ . (h, i) Quantification of the number of Ca<sup>2+</sup> spikes per minute in all neurons (h,  $N = 8, 6, 6, 6$  neurons,  $P = 0.0188, >0.9999, 0.0188$ ) or spiking neurons (i,  $N = 6, 6$  neurons,  $P = 0.5026$ ). (j-m) Shown is a graphical depiction of *Drosophila melanogaster* larva accompanied by depictions of C4da and C3da, highlighting their consistent morphology. (j) C4da neurons, which reside along the body wall, are shown in green. The ddaC, v'ada and vdaB C4da neurons, are shown along with a brief description of the 2-photon injury timeline. The red dotted line is meant to depict the 2-photon laser injury and subsequent injury site. Notably, at 24 h AI, Ca<sup>2+</sup> transients begin to occur; at 48 h AI, regrowth of injured axons has occurred. (k) C3da neurons, which also reside along the body wall, are shown in red. Similarly, the injury and injury site are depicted. C3da neurons, however, do not show the same Ca<sup>2+</sup> transients at 24 h AI, and thus do not regrow in the span of 72 h AI. (l) Both C4da and C3da neurons are enclosed in 3 layers of glia, as depicted in different colors. Importantly, the perineural and subperineural glia encase both the cell body and the axon, while the wrapping glia only cover the axon. Specifically shown is the v'ada in order to illustrate the distinct glia tract morphology. As shown in the three panels, the v'ada may grow dorsally or ventrally to the cell body (upwardly or downwardly in this depiction) within the glia tracts. (m) Depicted is a bundle of neurons including both C4da and C3da neurons. The close proximity allows for direct comparisons between the two cell types, particularly with regard to gene

expression and axon regeneration. (n) C4da neuron overexpression of Kir2.1 reduces axon regeneration. The dashed circle marks the injury site. Arrowheads mark the regrowing axon tip and arrow marks the stalled axon. (o) Quantification of axon regeneration by regeneration percentage and regeneration index.  $N = 72, 43$  neurons,  $P = 0.0183$  (top),  $0.0004$  (bottom).  $*P < 0.05$ ,  $**P < 0.01$ ,  $***P < 0.001$ , Fisher's exact test, two-sided (g and o top), unpaired Student's t-test, two-sided (i and o bottom), one-way ANOVA followed by Holm-Sidak's test (h). Scale bar =  $20 \mu\text{m}$ . Source data are provided as a Source Data file.

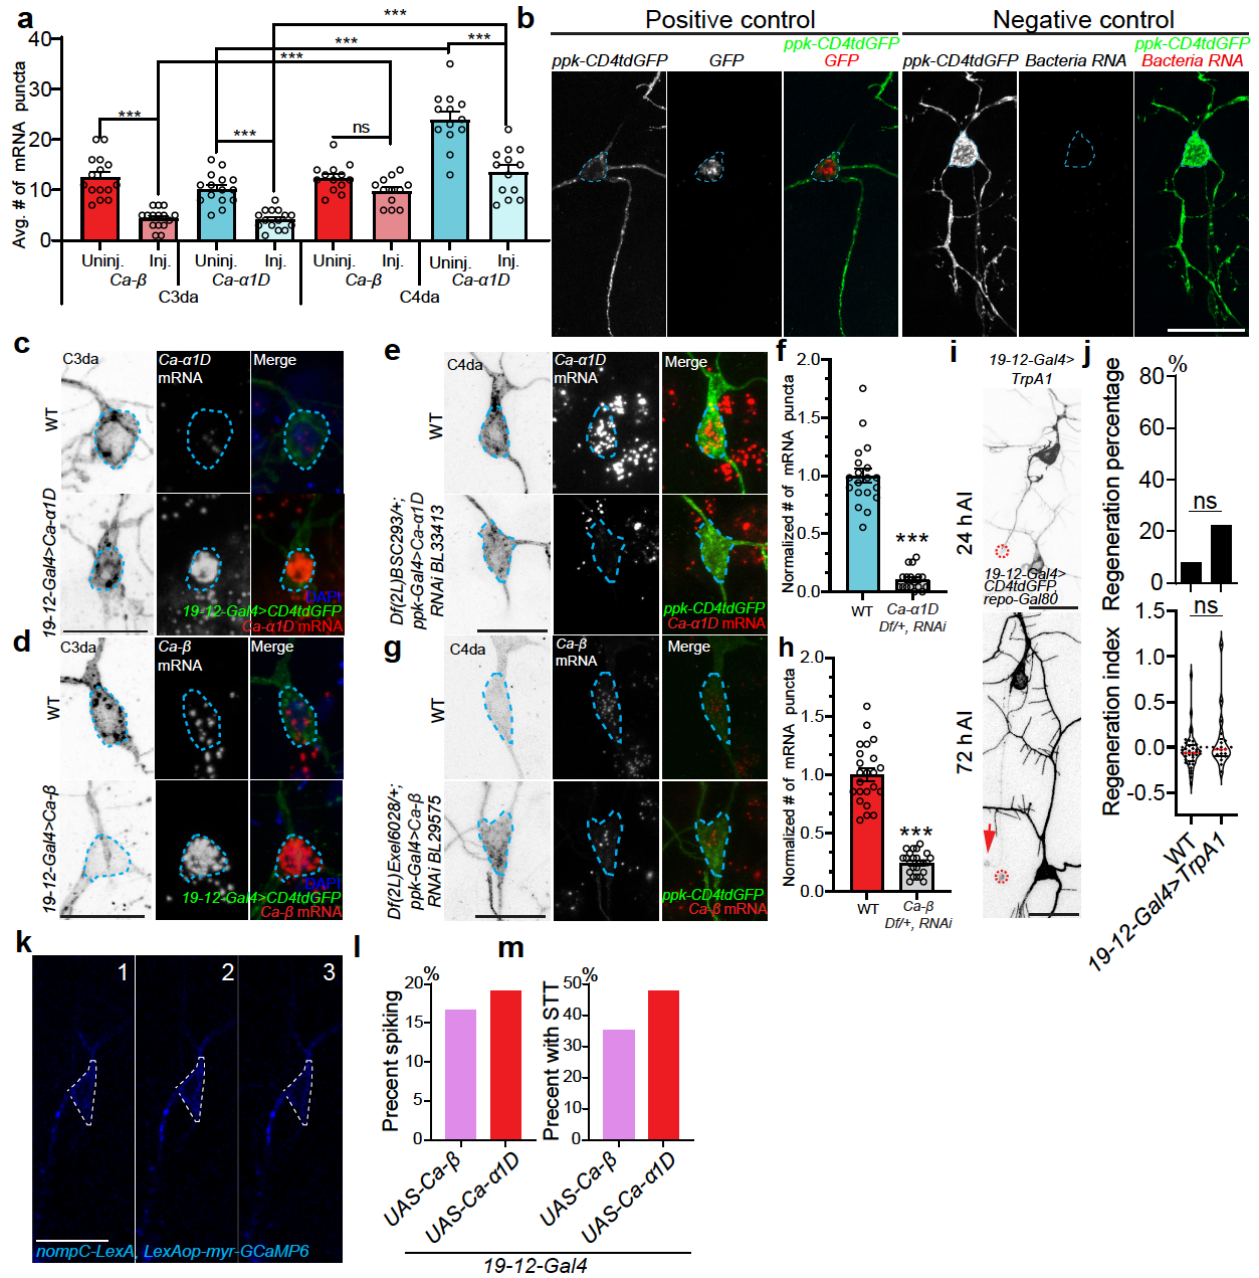

**Supplementary Fig. 2 Controls for RNAscope and expression analyses of Ca-α1D and Ca-β.**

(a) Quantification of the RNAscope analysis for Ca-α1D and Ca-β in C3da and C4da neurons with or without injury.  $N = 15, 15, 15, 15, 13, 13, 13, 13$  neurons. (b) General positive and negative controls for RNAscope. A *GFP* probe specifically recognizes the *GFP* transcripts in the soma of C4da neurons expressing *ppk-CD4tdGFP*. A probe against *Bacteria RNA* does not show specific

labeling in fly larvae. **(c, d)** Positive controls for *Ca- $\alpha$ 1D* and *Ca- $\beta$*  mRNA using overexpression in C3da neurons and showing an increased number of puncta compared to WT. **(e-h)** Negative controls for *Ca- $\alpha$ 1D* and *Ca- $\beta$*  mRNA in C4da neurons. **(e)** A heterozygous deficiency covering *Ca- $\alpha$ 1D* and C4da neuron targeted RNAi showed a decreased number of puncta. **(f)** Quantification of the number of *Ca- $\alpha$ 1D* mRNA puncta, normalized to the WT average.  $N = 19, 23$  neurons,  $P = <0.0001$ . **(g)** A heterozygous deficiency covering *Ca- $\beta$*  and C4da neuron targeted RNAi showed a decreased number of puncta. **(h)** Quantification of the number of *Ca- $\beta$*  mRNA puncta, normalized to the WT average.  $N = 17, 24$  neurons,  $P = <0.0001$ . **(i)** Overexpression of TrpA1 in C3da neurons at the non-activating temperature did not increase regeneration beyond WT levels. An arrow marks the stalled axon tip and dashed circle marks the injury site. **(j)** Quantification of C3da axon regeneration with regeneration percentage and regeneration index with overexpression of TrpA1.  $N = 38, 18$  neurons,  $P = 0.1949$  (top),  $0.2246$  (bottom). **(k-m)** Overexpression of *Ca- $\alpha$ 1D* or *Ca- $\beta$*  alone slightly increases STT, but to a lesser extent than the co-overexpression. **(k)** An example of *Ca- $\alpha$ 1D* overexpression is shown. **(l)** Quantification of the spiking percentage. **(m)** Quantification of the STT percentage.  $N = 17$  and  $21$  neurons.  $*P < 0.05$ ,  $**P < 0.01$ ,  $***P < 0.001$ , one-way ANOVA followed by Tukey's test (a), Fisher's exact test, two-sided (j top), two-tailed unpaired Student's t-test (f, h, j bottom). Scale bar =  $20 \mu\text{m}$ . Source data are provided as a Source Data file.

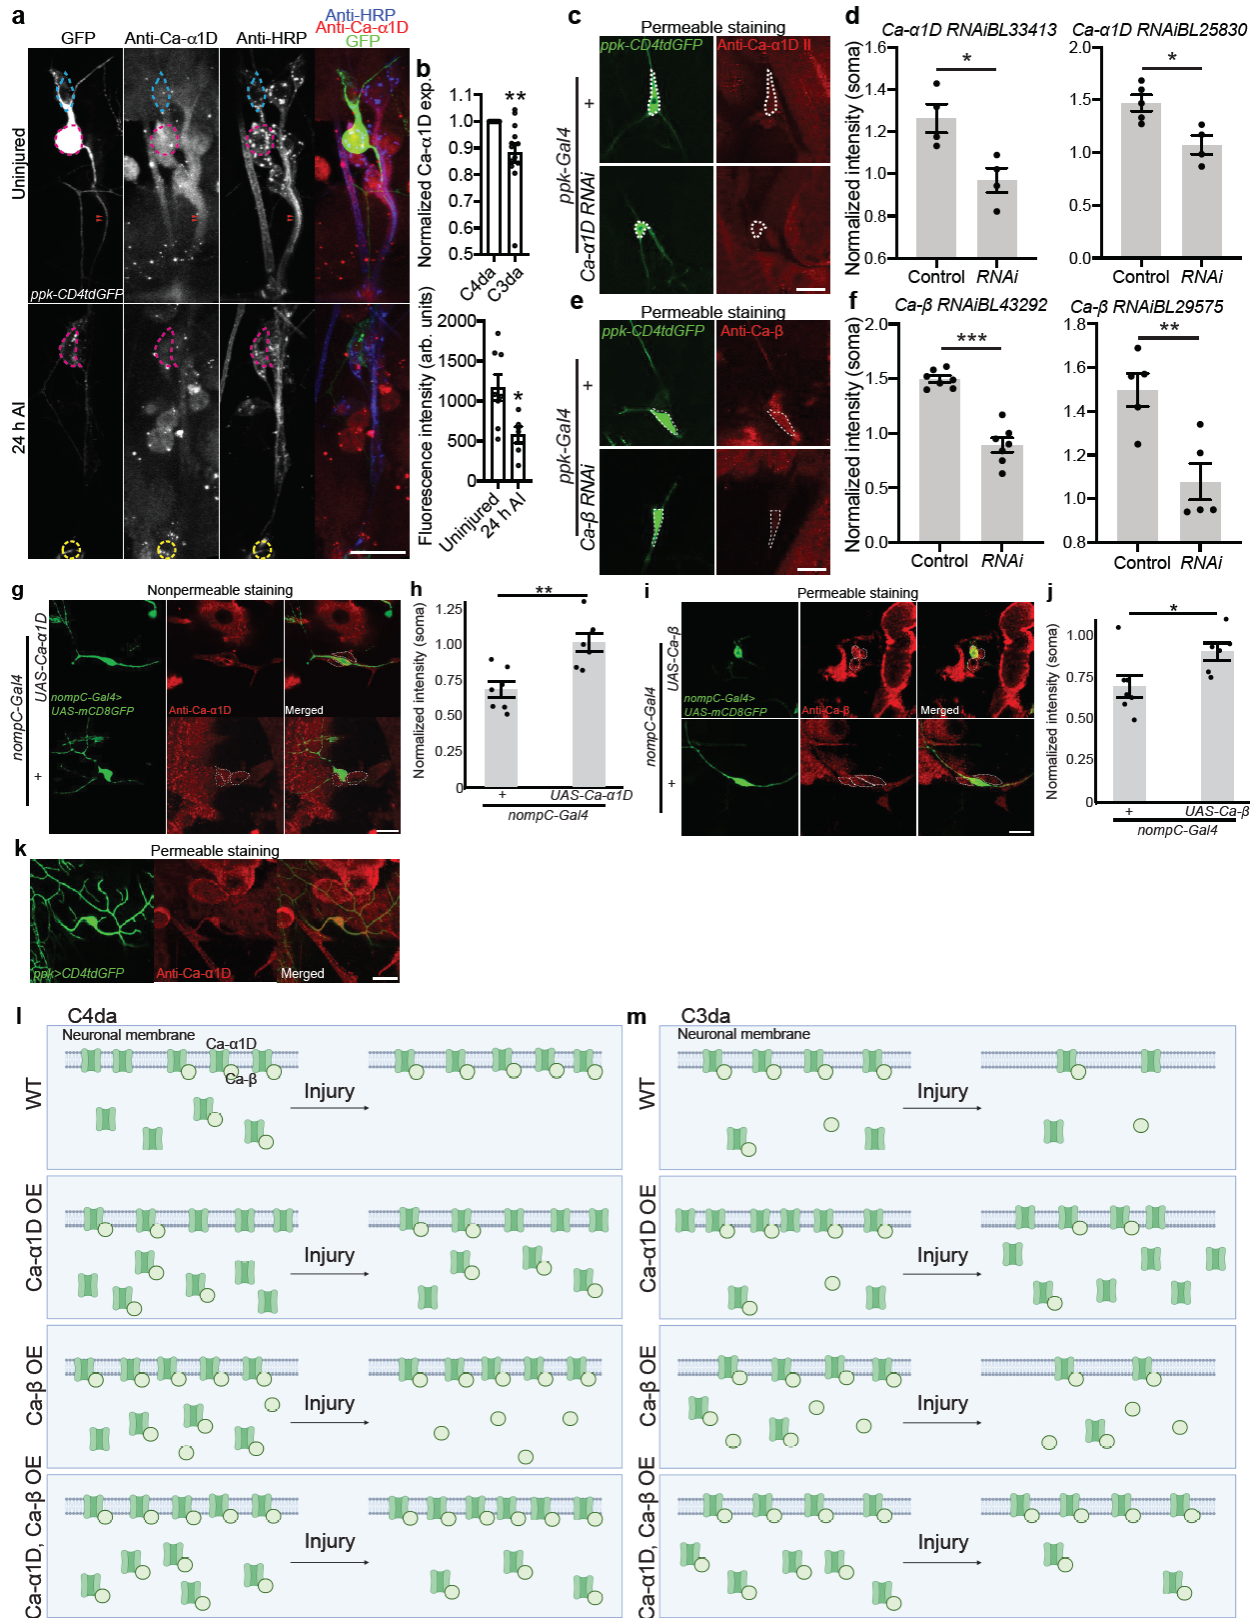

**Supplementary Fig. 3 Control and validation of Ca-α1D and Ca-β antibodies. (a, b)**

Expression of Ca- $\alpha$ 1D by a published Ca- $\alpha$ 1D antibody. (a) Ca- $\alpha$ 1D protein is present in the soma (pink dashed circle), axon (arrowheads) and dendrites of C4da neurons. Ca- $\alpha$ 1D is also present in C3da neurons (teal dashed circle). Axotomy reduces Ca- $\alpha$ 1D expression in C4da neurons. The injury site is marked by the yellow dashed circle. (b) Top, quantification of Ca- $\alpha$ 1D expression in the soma of C4da and C3da neurons. Mean fluorescence intensity is normalized to that of C4da neurons.  $N = 13$  neurons,  $P = 0.0024$ . Bottom, Mean fluorescence intensity for Ca- $\alpha$ 1D in C4da neurons with or without injury.  $N = 8, 6$  neurons,  $P = 0.0293$ . (c, d) Verification of Ca- $\alpha$ 1D expression with a second antibody and negative control in C4da. (c) Ca- $\alpha$ 1D is present in C4da neurons. (d) Quantification of Ca- $\alpha$ 1D level in the soma of control and C4da neuron-specific knockdown of Ca- $\alpha$ 1D using two independent RNAis.  $N = 4, 4, 5, 4$  neurons,  $P = 0.0160$  (left),  $0.0118$  (right). (e, f) Verification of Ca- $\beta$  expression with an antibody and negative control in C4da. (e) Ca- $\beta$  is present in C4da neurons. (f) Quantification of Ca- $\beta$  level in the soma of control and C4da neuron-specific knockdown of Ca- $\beta$  using two independent RNAis.  $N = 7, 7, 5, 5$  neurons,  $P = <0.0001$  (left),  $0.0057$  (right). (g, h) Verification of Ca- $\alpha$ 1D expression with a second antibody and positive control in C3da neurons. (g) Representative picture illustrates that Ca- $\alpha$ 1D level on the soma plasma membrane of control and Ca- $\alpha$ 1D-overexpressing C3da neurons, in the nonpermeable staining condition. (h) Quantification of Ca- $\alpha$ 1D level on the soma plasma membrane of control and Ca- $\alpha$ 1D-overexpressing C3da neurons in the permeable staining condition.  $N = 7, 7$  neurons,  $P = 0.0020$ . (i, j) Verification of Ca- $\beta$  expression with an antibody and positive control in C3da neurons. (i) Representative picture illustrates that Ca- $\beta$  level in the soma of control and Ca- $\beta$ -overexpressing C3da neurons. (j) Quantification of Ca- $\beta$  level in the soma of control and Ca- $\beta$ -overexpressing C3da neurons.  $N = 7, 6$  neurons,  $P = 0.0351$ . (k)



Representative image of Ca- $\alpha$ 1D expression using antibody in a permeabilized cell. **(l, m)**

Graphical representation of the Ca- $\beta$ /Ca- $\alpha$ 1D ratio hypothesis. The illustration in panels l and m was created using Biorender.com. \* $P < 0.05$ , \*\* $P < 0.01$ , \*\*\* $P < 0.001$ , Wilcoxon test (b top), Mann-Whitney test (b bottom), two-tailed unpaired Student's t-test (d, f, h, j). Scale bar = 20  $\mu$ m.

Source data are provided as a Source Data file.

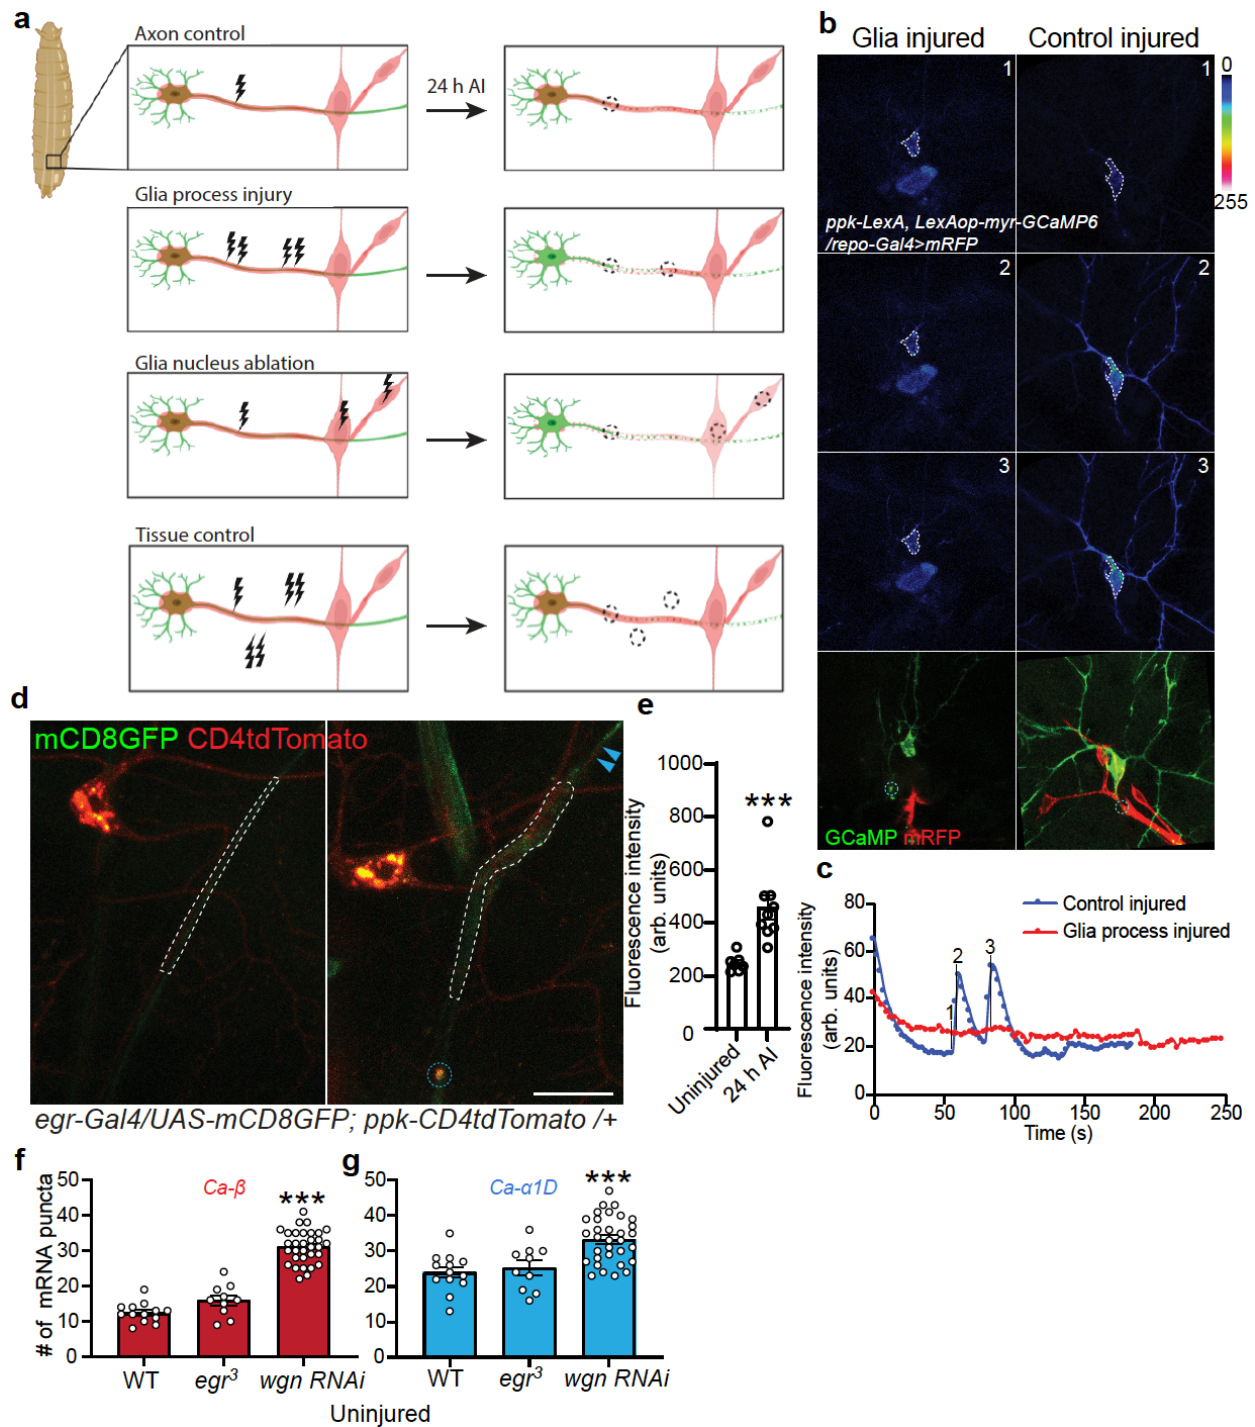

**Supplementary Fig. 4 Glia injury and *egr-Gal4* expression.** (a) The glia injury paradigm. The illustration in panel a was created using Biorender.com. (b, c) Glia injury reduces axotomy-induced  $\text{Ca}^{2+}$  transients. (b) Compared to axon only injury in which glia still wrap the C4da neuron soma and axon, injury to the glial processes leads to unwrapping of the soma and axon, and results

in reduced  $\text{Ca}^{2+}$  transients. (c) Plot of the mean intensity of the soma. (d, e) *egr* expression is assessed by *egr*-Gal4 driving a mCD8GFP reporter. (d) The injury site is demarcated by the dashed circle. Arrowheads show the regrowing axon tip. (e) Quantification of GFP fluorescence intensity in the area outlined by the white dashed line in d.  $N = 7, 9$  neurons,  $P = 0.0003$ . (f, g) Quantification of *Ca- $\alpha$ 1D* and *Ca- $\beta$*  mRNAs in uninjured C4da neurons after *egr* or *wgn* LoF.  $N = 13, 10, 32, 13, 10, 32$  neurons,  $P = <0.0001, <0.0001, ***P < 0.001$ , one-way ANOVA followed by Tukey's test, (f, g) Mann Whitney test (e). Scale bar = 20  $\mu\text{m}$ . Source data are provided as a Source Data file.

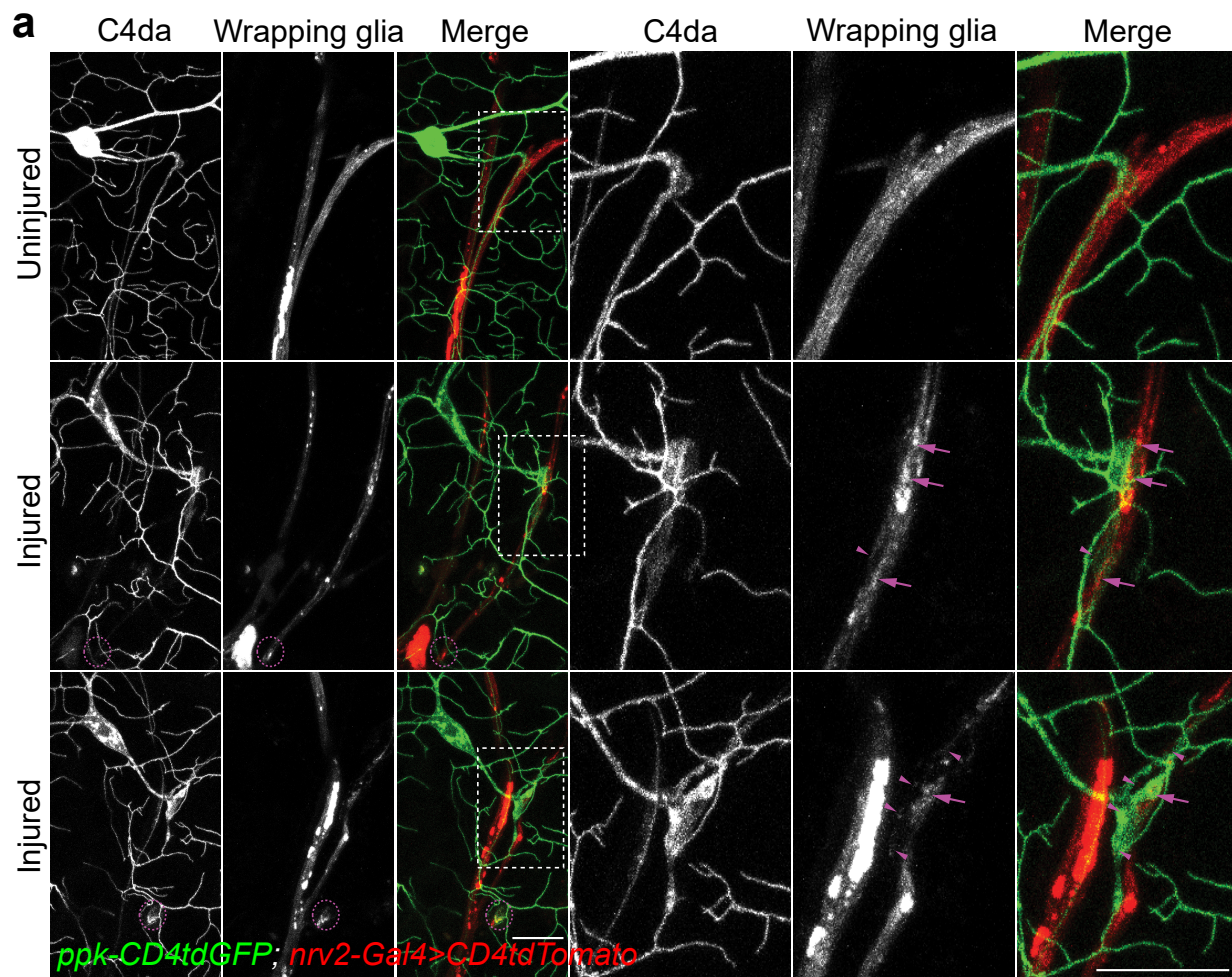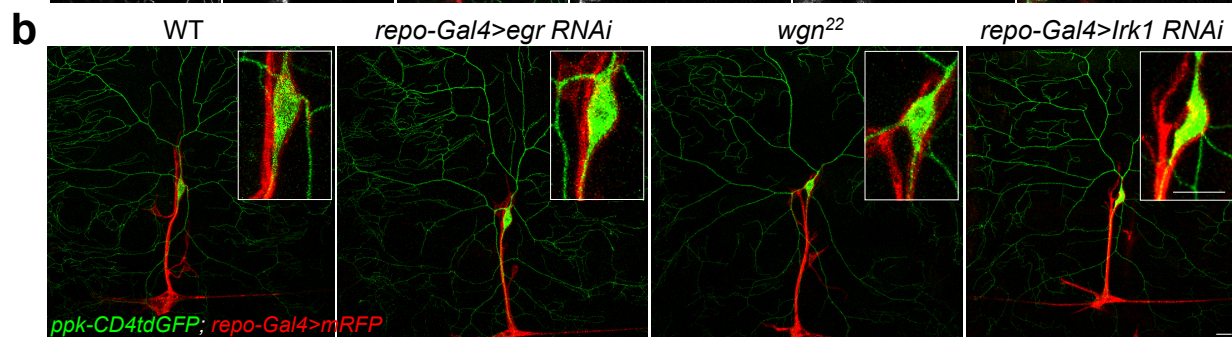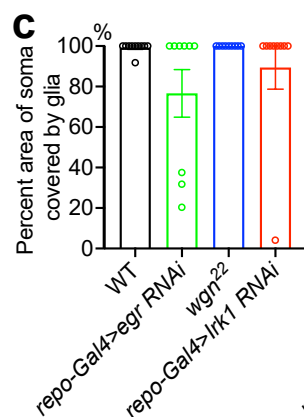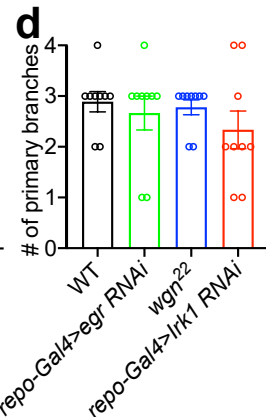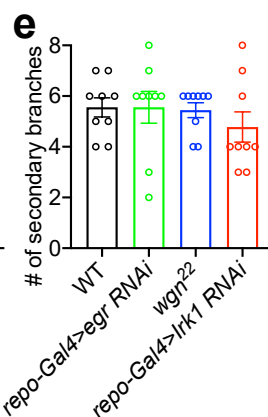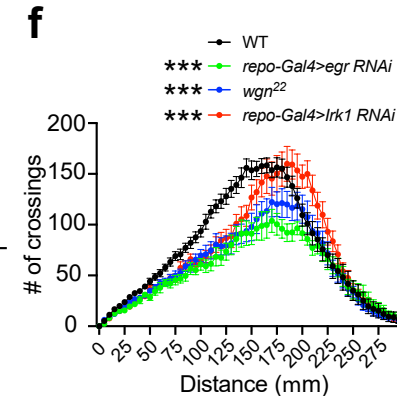

**Supplementary Fig. 5 Glial remodeling after axotomy, dendrite morphology after LoF of *egr-wgn* or *Irk1*.** (a) Glial processes around the regenerating axon appear to undergo remodeling. Wrapping glia change from their even distribution surrounding uninjured axons to a clustered appearance (arrows) after axotomy and occasionally extend thin processes that contact the axon tip (arrowheads). The injury site is demarcated by the dashed circle. (b) Representative images of C4da neurons and glia from the various genotypes. The soma region is further shown in the white box. (c-f) Quantifications of glia wrapping, number of primary and secondary dendritic branches, and dendrite complexity with the sholl analysis.  $N = 10, 9, 9, 9$  neurons (c), 9 neurons (d and e), 19, 9, 12, 9 neurons (f).  $***P < 0.001$ , one-way ANOVA followed by Dunn's test (c-e), two-way ANOVA followed by Tukey's test (f). Scale bar = 20  $\mu\text{m}$ . Source data are provided as a Source Data file.

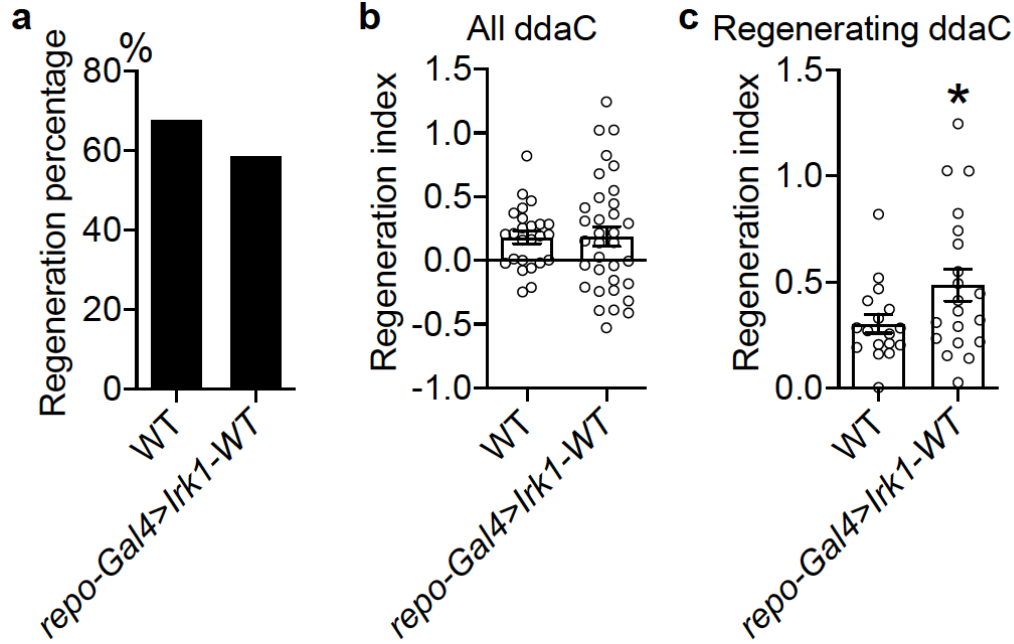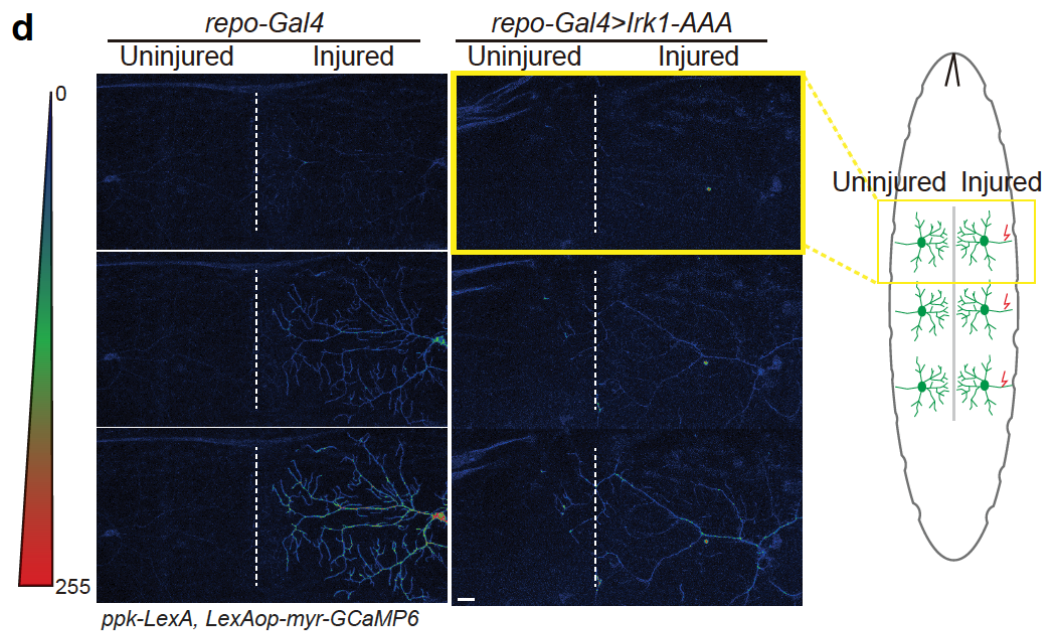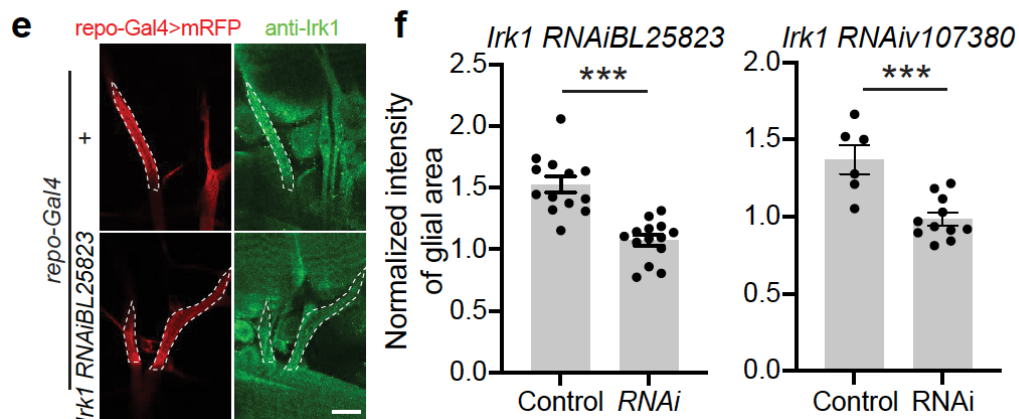

**Supplementary Fig. 6 Glial Irk1 overexpression enhances C4da neuron axon regeneration, while inhibiting glial Irk1 reduces axotomy-induced Ca<sup>2+</sup> transients in C4da neurons, and Irk1 expression analysis by an Irk1 antibody.** (a-c) Glial overexpression of Irk1-WT increases axon regrowth among the regenerating C4da neuron ddaC.  $N = 25, 34$  neurons,  $P = 0.5886, 0.9383$ , (a, b) and  $17, 20$  neurons,  $P = 0.0452$  (c). (d) C4da neurons show Ca<sup>2+</sup> spikes after axonal injury in WT (right side), compared to uninjured side in the same larvae (left side). LoF of Irk1 by glial overexpression of Irk1-AAA reduces Ca<sup>2+</sup> spikes. (e, f) Verification of Irk1 expression with an antibody. (e) Irk1 is present in glial cells. (f) Quantification Irk1 level in glial processes (dashed line) of control and glia-specific knockdown of Irk1 using two independent RNAis.  $N = 13, 14, 6, 11$  fields of view,  $P = <0.0001$  (left),  $0.0005$  (right).  $*P < 0.05$ ,  $***P < 0.001$ , Fisher's exact test, two-sided (a), two-tailed unpaired Student's t-test (b, c, and f). Scale bar = 20  $\mu\text{m}$ . Source data are provided as a Source Data file.

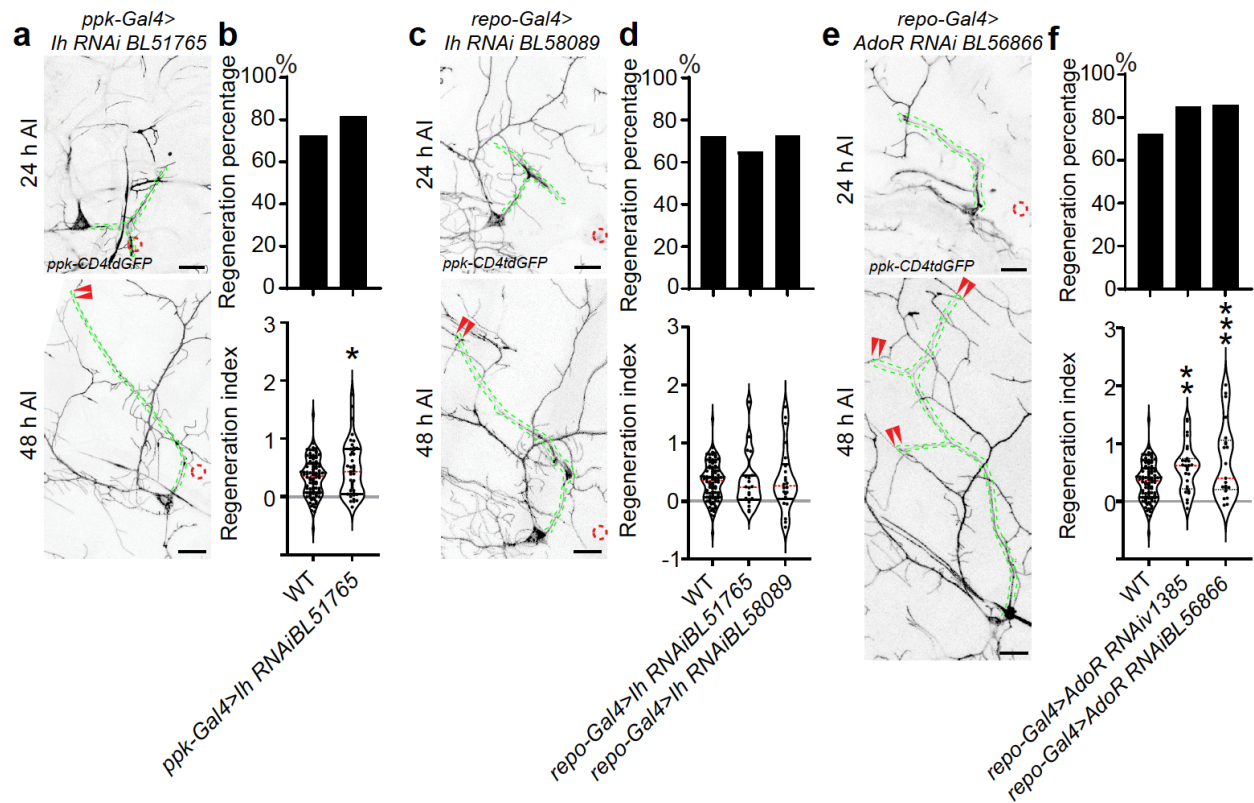

**Supplementary Fig. 7 Neuronal versus glial knockdown of *Ih* or *AdoR*.** (a) C4da neuron specific knockdown of *Ih* using a second RNAi (*ppk-Gal4Ih RNAi BL51765*) modestly increases axon regeneration. Arrowheads mark the regrowing axon tip and dashed circle marks the injury site. (b) Quantification of C4da axon regeneration with regeneration percentage and regeneration index with C4da neuron knockdown of *Ih*.  $N = 94$ , 41 neurons. (c) Glia-specific knockdown of *Ih* with two independent RNAis does not alter axon regeneration. (d) Quantification of C4da axon regeneration with regeneration percentage and regeneration index, with glia knockdown of *Ih*.  $N = 94$ , 20, 35 neurons. (e) Glia-specific knockdown of *AdoR* with two independent RNAis significantly increases axon regeneration. (f) Quantification of C4da axon regeneration with regeneration percentage and regeneration index, with glia knockdown of *AdoR*.  $N = 94$ , 27, 21 neurons. \* $P < 0.05$ , \*\* $P < 0.01$ , \*\*\* $P < 0.001$ , Fisher's exact test, two-sided (b top, d top and f



top), two-tailed unpaired Student's t-test (b bottom), one-way ANOVA followed by Holm-Sidak's test (d bottom and f bottom). Scale bar = 20  $\mu\text{m}$ . Source data are provided as a Source Data file.

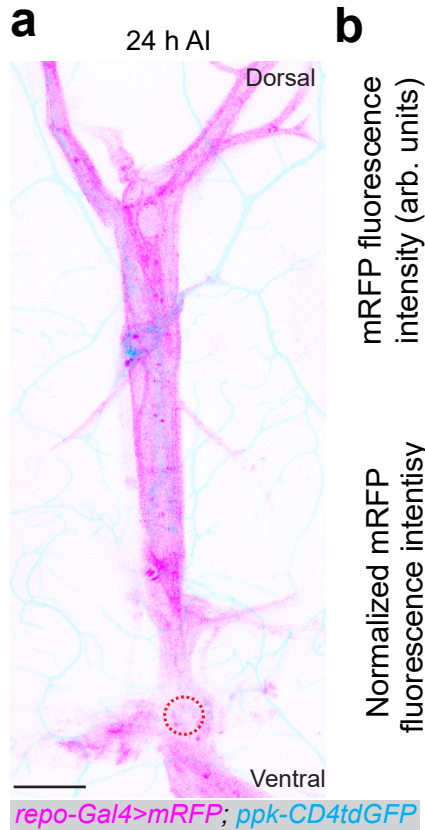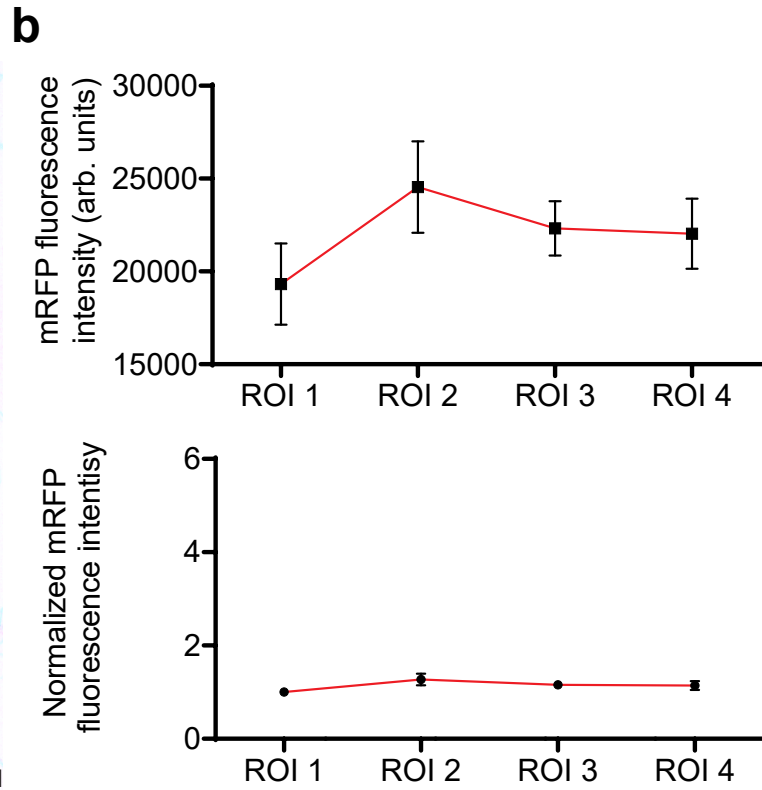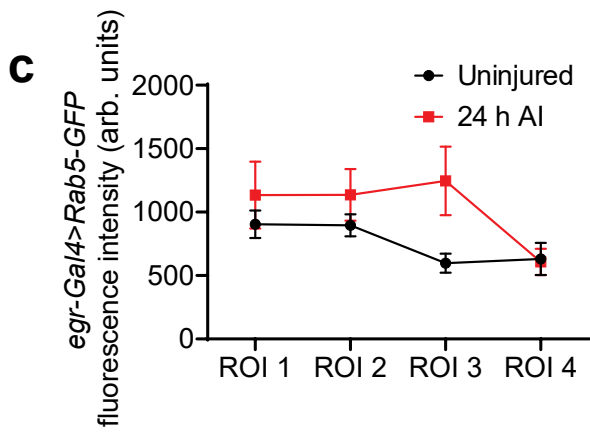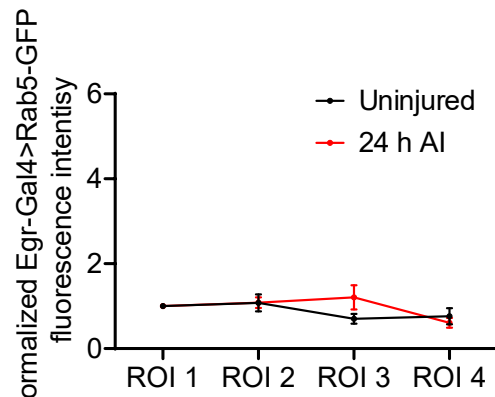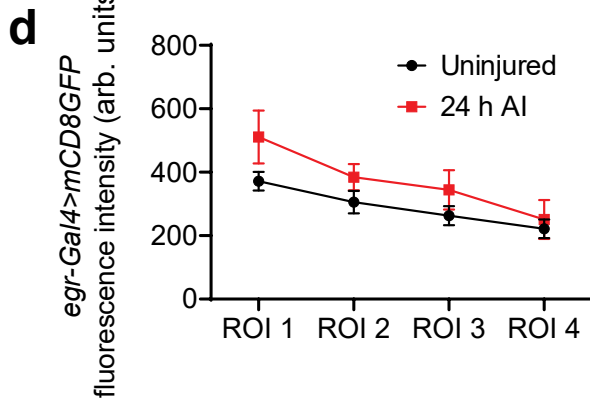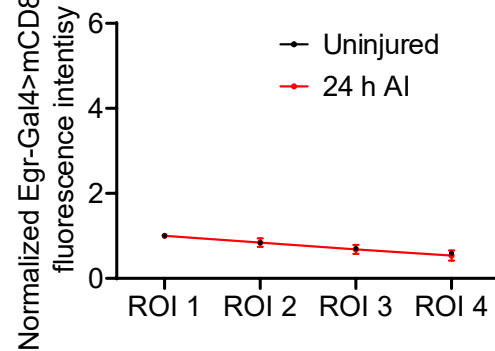

**Supplementary Fig. 8 mRFP and egr do not show a concentration gradient along C4da neuron axons.** (a) Control for fluorescence gradient of glia using repo-Gal4 driving a mRFP reporter, showing no gradient in either direction. (b) Plots of fluorescence intensity over the four ROIs, with the bottom plot being normalized to the fluorescence of ROI 1.  $N = 16$  neurons per ROI. (c, d) Plots of fluorescence intensity over the four ROIs by egr-Gal4 driving a Rab5-GFP reporter and an mCD8GFP reporter respectively are shown. The right-side plots are normalized to the fluorescence of the first ROI. No clear gradient can be seen.  $N = 7$  (uninjured) and 7 (24 h AI) neurons per ROI (a), 7 (uninjured) and 9 (24 h AI) neurons per ROI (b). Source data are provided as a Source Data file.
